# Supplementary material for: Health status of street children and reasons for being forced to live on the streets in Harar, Eastern Ethiopia. Using mixed methods
Source: PubMed Central journal article supplement (PMC8932583; doi:10.1371/journal.pone.0265601), 2022-03-18
Supplement: pone.0265601.s001.pdf [file pone.0265601.s001.pdf]

Supplementary file: Table: Distribution of sample interviewees by selected sites in the Harar, eastern Ethiopia, 2021

| S. No | Name of the Sub town | Total of registered | Number of the interviewees |
|-------|----------------------|---------------------|----------------------------|
| 1     | Arategna             | 50                  | 23                         |
| 2     | Agip                 | 61                  | 28                         |
| 3     | Canal                | 53                  | 24                         |
| 4     | Bote                 | 92                  | 42                         |
| 5     | Shewa Ber            | 101                 | 46                         |
| 6     | Andegan Menged       | 99                  | 44                         |
| 7     | Feres megala         | 46                  | 21                         |
|       | Total                | 502                 | 228                        |
