# Supplementary material for: Health status of street children and reasons for being forced to live on the streets in Harar, Eastern Ethiopia. Using mixed methods
Source: PubMed Central journal article supplement (PMC8932583; doi:10.1371/journal.pone.0265601), 2022-03-18
Supplement: pone.0265601.s002.pdf [file pone.0265601.s002.pdf]

## S1 file- Data collection questionnaire

Questionnaire code no: \_\_\_\_\_

Data collector name: \_\_\_\_\_

| S. No                                                         | Questions                            | Response                                                                                               | Remark |
|---------------------------------------------------------------|--------------------------------------|--------------------------------------------------------------------------------------------------------|--------|
| <b>Socio-demographic characteristics of study participant</b> |                                      |                                                                                                        |        |
| 101                                                           | Age (in years)                       | _____                                                                                                  |        |
| 102                                                           | Gender                               | 1. Male<br>2. Female                                                                                   |        |
| 103                                                           | Present address                      | 1. Urban<br>2. Rural                                                                                   |        |
| 104                                                           | Place of birth                       | _____                                                                                                  |        |
| 105                                                           | Ethnicity                            | 1. Oromo<br>2. Amhara<br>3. Harari<br>4. Other, specify/_____/                                         |        |
| 106                                                           | Religion                             | 1. Muslim<br>2. Orthodox<br>3. Protestant<br>4. Other, specify/_____/                                  |        |
| 107                                                           | What is your current marital status? | 1. Currently married<br>2. Never married<br>3. Divorced<br>4. Widowed<br>5. Others, specify<br>/_____/ |        |
| <b>Education background of the child</b>                      |                                      |                                                                                                        |        |

|                                             |                                                                                                                          |                                                                                                                                                                                                                                                                                                                                       |  |
|---------------------------------------------|--------------------------------------------------------------------------------------------------------------------------|---------------------------------------------------------------------------------------------------------------------------------------------------------------------------------------------------------------------------------------------------------------------------------------------------------------------------------------|--|
| <b>201</b>                                  | Educational status                                                                                                       | <ol style="list-style-type: none"> <li>1. Never attend school</li> <li>2. Only read and write</li> <li>3. 1 -4 grade</li> <li>4. 5 – 8 grade</li> <li>5. 9 -12 grade</li> </ol>                                                                                                                                                       |  |
| <b>202</b>                                  | If you have never been enrolled to school, what factors hindered you from attending it?                                  | <ol style="list-style-type: none"> <li>1. Family poverty/Financial constraints</li> <li>2. No school available nearby</li> <li>3. Family did not attach value to education</li> <li>4. Had to remain home to help the family</li> <li>5. Others (specify)</li> </ol>                                                                  |  |
| <b>203</b>                                  | If you are school dropout now, why did you give up schooling?                                                            | <ol style="list-style-type: none"> <li>1. Family could no longer afford school fees</li> <li>2. I had to work to supplement family income</li> <li>3. Poor academic performance</li> <li>4. Health/medical reasons</li> <li>5. Expelled because of conduct</li> <li>6. To make my own reading</li> <li>7. Others (specify)</li> </ol> |  |
| <b>204</b>                                  | If you are given the chance to continue your education now, are you willing to and happy to make use of the opportunity? | <ol style="list-style-type: none"> <li>1. Yes</li> <li>2. No</li> </ol>                                                                                                                                                                                                                                                               |  |
| <b>Family background of the interviewee</b> |                                                                                                                          |                                                                                                                                                                                                                                                                                                                                       |  |
| <b>301</b>                                  | Do you have parents?                                                                                                     | <ol style="list-style-type: none"> <li>1. Yes</li> <li>2. No</li> </ol>                                                                                                                                                                                                                                                               |  |
| <b>302</b>                                  | Are your parents alive?                                                                                                  | <ol style="list-style-type: none"> <li>1. Both alive</li> </ol>                                                                                                                                                                                                                                                                       |  |

|            |                                                                          |                                                                                                                                                                                                                                                                                                                                                   |  |
|------------|--------------------------------------------------------------------------|---------------------------------------------------------------------------------------------------------------------------------------------------------------------------------------------------------------------------------------------------------------------------------------------------------------------------------------------------|--|
|            |                                                                          | <ol style="list-style-type: none"> <li>2. both are dead</li> <li>3. Only mother alive</li> <li>4. Only father alive</li> <li>5. Do not know</li> </ol>                                                                                                                                                                                            |  |
| <b>303</b> | If both are still alive, what was/is the marital status of your parents? | <ol style="list-style-type: none"> <li>1. Married and living together</li> <li>2. Divorced due to bad marriage arrangements</li> <li>3. Circumstantial separation (war, work displacement...)</li> <li>4. Widowed</li> <li>5. Single parent</li> <li>6. Separated because of death</li> <li>7. Don't know</li> <li>8. Others (specify)</li> </ol> |  |
| <b>304</b> | If divorced, in your opinion what was the cause of the divorce?          | <ol style="list-style-type: none"> <li>1. Poverty</li> <li>2. father left home to look for a job</li> <li>3. Bad habit</li> <li>4. others (specify)</li> </ol>                                                                                                                                                                                    |  |
| <b>305</b> | What is/was your mother's means of livelihood?                           | <ol style="list-style-type: none"> <li>1. informal daily worker</li> <li>2. petty seller/trader</li> <li>3. skilled worker/self-employed</li> <li>4. house servant</li> <li>5. beggar</li> <li>6. house wife</li> <li>7. other (specify)</li> </ol>                                                                                               |  |
| <b>306</b> | What is/was your father's means of income/livelihood?                    | <ol style="list-style-type: none"> <li>1. Farming</li> <li>2. Informal daily labourer</li> <li>3. Trader</li> <li>4. Government employee</li> <li>5. private employee</li> <li>6. beggar</li> </ol>                                                                                                                                               |  |

|            |                                                                         |                                                                                                                                                                                                                                          |  |
|------------|-------------------------------------------------------------------------|------------------------------------------------------------------------------------------------------------------------------------------------------------------------------------------------------------------------------------------|--|
|            |                                                                         | <ul style="list-style-type: none"> <li>7. soldier/x-soldier</li> <li>8. guard</li> <li>9. other (specify)</li> </ul>                                                                                                                     |  |
| <b>307</b> | Where do your parents live now?                                         | <ul style="list-style-type: none"> <li>1. In Harar</li> <li>2. In another urban town</li> <li>3. In rural areas</li> <li>4. Don't know</li> <li>5. If in Harar, please state residential area, i.e., Woreda, Kebele? (If any)</li> </ul> |  |
| <b>308</b> | Who supports the family now?                                            | <ul style="list-style-type: none"> <li>1. Father Only</li> <li>2. Mother only</li> <li>3. both mother &amp; father</li> <li>4. Extended family</li> <li>5. Myself</li> <li>6. Other (specify)</li> </ul>                                 |  |
| <b>309</b> | If your parents are migrants, why did they leave their place of origin? | <ul style="list-style-type: none"> <li>1. Drought/famine situation</li> <li>2. To look for a job</li> <li>3. For medical treatment</li> <li>4. Don't know</li> <li>5. Others (specify)</li> </ul>                                        |  |
| <b>310</b> | What is your parents' monthly income?<br>Approximately                  | <ul style="list-style-type: none"> <li>1. &lt;1000</li> <li>2. 1000-2000</li> <li>3. &gt;2000</li> <li>4. I don't know</li> </ul>                                                                                                        |  |
| <b>311</b> | What is the educational status of your father?                          | <ul style="list-style-type: none"> <li>1. Illiterate</li> <li>2. Can read and write</li> <li>3. Highest grade completed</li> </ul>                                                                                                       |  |
| <b>312</b> | In what type of a house are your parents living now?                    | <ul style="list-style-type: none"> <li>1. Brick stone</li> <li>2. Bamboo sticks</li> <li>3. Mud house</li> </ul>                                                                                                                         |  |

|                                                      |                                                                                     |                                                                                                                                                                                                                                                                                                                                         |  |
|------------------------------------------------------|-------------------------------------------------------------------------------------|-----------------------------------------------------------------------------------------------------------------------------------------------------------------------------------------------------------------------------------------------------------------------------------------------------------------------------------------|--|
|                                                      |                                                                                     | <ul style="list-style-type: none"> <li>4. Plastic/scrap</li> <li>5. Tin</li> <li>6. Other (specify) _____</li> </ul>                                                                                                                                                                                                                    |  |
| <b>Present life style/circumstances of the child</b> |                                                                                     |                                                                                                                                                                                                                                                                                                                                         |  |
| <b>401</b>                                           | For how long have you been engaged in street way of life? (Duration of street life) | 1. ____Yrs__ Mos                                                                                                                                                                                                                                                                                                                        |  |
| <b>402</b>                                           | What factors forced you to resort to street way of life?                            | <ul style="list-style-type: none"> <li>1. Peer pressure</li> <li>2. To look for a job</li> <li>3. Quarreled with parents</li> <li>4. In search of food</li> <li>5. Forced</li> <li>6. Deaths of parents</li> <li>7. Lack of peace in the family</li> <li>8. Failure of family to support me</li> <li>9. Other (specify)_____</li> </ul> |  |
| <b>403</b>                                           | Do you work?                                                                        | <ul style="list-style-type: none"> <li>1. Yes</li> <li>2. No</li> </ul>                                                                                                                                                                                                                                                                 |  |
| <b>404</b>                                           | If your answer is no, how do you survive?                                           | _____                                                                                                                                                                                                                                                                                                                                   |  |
| <b>405</b>                                           | What is your street occupation?                                                     | <ul style="list-style-type: none"> <li>1. Begging</li> <li>2. Shoe shinning</li> <li>3. Carrying small items</li> <li>4. Delivering messages</li> <li>5. peddler</li> <li>6. Taxi boy</li> <li>7. Other (specify) _____</li> </ul>                                                                                                      |  |
| <b>406</b>                                           | How much do you get on the average per day?                                         | <ul style="list-style-type: none"> <li>1. Less than five birr</li> <li>2. 5 -10 birr</li> <li>3. 10 -20 birr</li> </ul>                                                                                                                                                                                                                 |  |

|            |                                                                                                         |                                                                                                                                                                                                                           |  |
|------------|---------------------------------------------------------------------------------------------------------|---------------------------------------------------------------------------------------------------------------------------------------------------------------------------------------------------------------------------|--|
|            |                                                                                                         | <ul style="list-style-type: none"> <li>4. 30-50 birr</li> <li>5. more than 50 birr</li> </ul>                                                                                                                             |  |
| <b>407</b> | How do you spend your daily income?                                                                     | <ul style="list-style-type: none"> <li>1. Food</li> <li>2. Shelter</li> <li>3. Cloth</li> <li>4. School fee</li> <li>5. Help family</li> <li>6. Other (specify)_____</li> </ul>                                           |  |
| <b>408</b> | If you are contributing to the family budget, what is your parents' attitude towards your contribution? | <ul style="list-style-type: none"> <li>1. Happy</li> <li>2. Unhappy</li> <li>3. Indifferent</li> <li>4. Don't know</li> </ul>                                                                                             |  |
| <b>409</b> | Is your daily income reliable?                                                                          | <ul style="list-style-type: none"> <li>1. Yes</li> <li>2. No</li> </ul>                                                                                                                                                   |  |
| <b>410</b> | Do you beg on the streets?                                                                              | <ul style="list-style-type: none"> <li>1. Yes</li> <li>2. No</li> </ul>                                                                                                                                                   |  |
| <b>411</b> | If yes, how often?                                                                                      | <ul style="list-style-type: none"> <li>1. Always</li> <li>2. Often</li> <li>3. Sometimes</li> <li>4. Rarely</li> <li>5. Never</li> </ul>                                                                                  |  |
| <b>412</b> | With whom were you living before you resort to street life?                                             | <ul style="list-style-type: none"> <li>1. With both parents</li> <li>2. With my mother</li> <li>3. With father only</li> <li>4. With close relatives</li> </ul>                                                           |  |
| <b>413</b> | With whom are you living now?                                                                           | <ul style="list-style-type: none"> <li>1. With my mother</li> <li>2. with both parents</li> <li>3. With relatives</li> <li>4. With father Alone</li> <li>5. With peers/friends</li> <li>6. Other, specify_____</li> </ul> |  |

|     |                                                                                                         |                                                                                                                                                                                                                                     |  |
|-----|---------------------------------------------------------------------------------------------------------|-------------------------------------------------------------------------------------------------------------------------------------------------------------------------------------------------------------------------------------|--|
| 414 | Who helps and protects you while you are on the street?                                                 | <ol style="list-style-type: none"> <li>1. No one</li> <li>2. Siblings</li> <li>3. Peer groups</li> <li>4. Parents</li> <li>5. Close relatives</li> </ol>                                                                            |  |
| 415 | How often do you usually see/visit your families?                                                       | <ol style="list-style-type: none"> <li>1. Everyday</li> <li>2. at least once in a week</li> <li>3. Once in every month</li> <li>4. only few times in a year</li> <li>5. Rarely</li> <li>6. Irregularly</li> <li>7. Never</li> </ol> |  |
| 416 | Do you think your parents or guardians approve/disapprove of your living and/or working on the streets? | <ol style="list-style-type: none"> <li>1. Approve</li> <li>2. Disapprove</li> <li>3. Don't care</li> <li>4. Don't know</li> </ol>                                                                                                   |  |
| 417 | How many times a day do you eat?                                                                        | <ol style="list-style-type: none"> <li>1. Once</li> <li>2. Twice</li> <li>3. Trice</li> </ol>                                                                                                                                       |  |
| 418 | What kind of food do you usually eat?                                                                   | _____                                                                                                                                                                                                                               |  |
| 419 | Where do you usually go to sleep?                                                                       | <ol style="list-style-type: none"> <li>1. Home</li> <li>2. church yards</li> <li>3. mosque yards</li> <li>4. Bus stops</li> <li>5. on verandah</li> <li>6. cheap hotels</li> </ol>                                                  |  |
| 420 | What are the major problems that you currently encounter in your day-to-day street life?                |                                                                                                                                                                                                                                     |  |

|            |                                                                                                                                                                         |                                                                                                                                        |  |
|------------|-------------------------------------------------------------------------------------------------------------------------------------------------------------------------|----------------------------------------------------------------------------------------------------------------------------------------|--|
| <b>421</b> | Have you ever been sick while living or working on the streets?                                                                                                         | 1. Yes<br>2. No                                                                                                                        |  |
| <b>422</b> | If yes to Q421, what kind of illness?                                                                                                                                   |                                                                                                                                        |  |
| <b>423</b> | Whom do you usually call on when and, as you get sick?                                                                                                                  |                                                                                                                                        |  |
| <b>424</b> | Do you have any kind of habit/addiction?                                                                                                                                | 1. Yes<br>2. No                                                                                                                        |  |
| <b>425</b> | If yes to Q424, what kind?                                                                                                                                              |                                                                                                                                        |  |
| <b>426</b> | Have you ever been beaten or hurt by adults while living/working on streets?                                                                                            | 1. Yes<br>2. No                                                                                                                        |  |
| <b>427</b> | Has anyone forced you to do any sexual act?                                                                                                                             | 1. Yes<br>2. No                                                                                                                        |  |
| <b>428</b> | Have you ever had any sexual intercourse with someone for the sake of money?                                                                                            | 1. Yes<br>2. No                                                                                                                        |  |
| <b>429</b> | Which of the following is your immediate need?                                                                                                                          | 1. Food<br>2. Cloth<br>3. Shelter<br>4. Education<br>5. Family support<br>6. Cash assistance<br>7. Get reunified<br>8. Other (specify) |  |
| <b>430</b> | What do you personally think or believe is the most appropriate intervention measure/s that must be undertaken right now in order to help you improve your way of life? |                                                                                                                                        |  |

**Substance and alcohol Abuse**



|            |                                                                             |                                                                                                                                                                                                                     |  |
|------------|-----------------------------------------------------------------------------|---------------------------------------------------------------------------------------------------------------------------------------------------------------------------------------------------------------------|--|
| <b>501</b> | Do you drink alcoholic beverage like Tela, Tej, Beer, Arekie and the likes? | <ol style="list-style-type: none"> <li>1. Have never drunk</li> <li>2. I have tried once or twice</li> <li>3. I drink most of the time</li> <li>4. I drink daily</li> </ol>                                         |  |
| <b>502</b> | What initiates you to use alcohol?                                          | <ol style="list-style-type: none"> <li>1. Depression</li> <li>2. Peer pressure</li> <li>3. To protect hunger</li> <li>4. To protect fear (sex, steal)</li> <li>5. other, specify /_____/</li> </ol>                 |  |
| <b>503</b> | Do you use drugs?                                                           | <ol style="list-style-type: none"> <li>1. Yes</li> <li>2. No</li> </ol>                                                                                                                                             |  |
| <b>504</b> | If yes, which drug do you use most of the time?                             | <ol style="list-style-type: none"> <li>1. Chat chewing</li> <li>2. Ganja/Hashish,</li> <li>3. Cigarette smoking</li> <li>4. Sniff Benzene</li> <li>5. Injectable drug</li> <li>6. Other, specify /_____/</li> </ol> |  |
| <b>505</b> | What initiates you to use drugs?                                            | <ol style="list-style-type: none"> <li>5. Depression</li> <li>6. Peer pressure</li> <li>7. To protect hunger</li> <li>8. To protect fear (sex, steal)</li> <li>9. other,specify /_____/</li> </ol>                  |  |

**Risk sexual and Reproductive health practices**

|            |                                                                    |                                                                                                                           |  |
|------------|--------------------------------------------------------------------|---------------------------------------------------------------------------------------------------------------------------|--|
| <b>601</b> | Have you ever had sexual intercourse?                              | <ol style="list-style-type: none"> <li>1. Yes</li> <li>2. No</li> </ol>                                                   |  |
| <b>602</b> | If yes to Q601, at what age did you first have sexual intercourse? | _____                                                                                                                     |  |
| <b>603</b> | Why did you decide to have sexual intercourse the first time?      | <ol style="list-style-type: none"> <li>1. I get married</li> <li>2. Fell in love.</li> <li>3. Personal desire.</li> </ol> |  |

|            |                                                                                |                                                                                                                                                                                                                                                                                             |  |
|------------|--------------------------------------------------------------------------------|---------------------------------------------------------------------------------------------------------------------------------------------------------------------------------------------------------------------------------------------------------------------------------------------|--|
|            |                                                                                | <ol style="list-style-type: none"> <li>4. Coercion (Rape).</li> <li>5. To get money and other gifts.</li> <li>6. Peer pressure</li> <li>7. Influence of khat /alcohol</li> <li>8. Others, specify /_____/</li> </ol>                                                                        |  |
| <b>604</b> | With whom did you make your first sexual intercourse?                          | <ol style="list-style-type: none"> <li>1. Husband/wife</li> <li>2. with a steady boy/girl friend</li> <li>3. with a casual boy/girl friend</li> <li>4. with a family member</li> <li>5. with commercial sex worker</li> <li>6. others, specify /_____/</li> </ol>                           |  |
| <b>605</b> | Have you had sexual intercourse within the past 1 month?                       | <ol style="list-style-type: none"> <li>1. Yes</li> <li>2. No</li> </ol>                                                                                                                                                                                                                     |  |
| <b>606</b> | How many sexual partners have you ever had?                                    | <ol style="list-style-type: none"> <li>1. _____</li> <li>2. NA</li> </ol>                                                                                                                                                                                                                   |  |
| <b>607</b> | Have you been raped without the consent of you during the past 12 months?      | <ol style="list-style-type: none"> <li>1. Yes</li> <li>2. No</li> </ol>                                                                                                                                                                                                                     |  |
| <b>608</b> | If yes, have you used condom or contraceptives?                                | <ol style="list-style-type: none"> <li>1. Yes</li> <li>2. No</li> </ol>                                                                                                                                                                                                                     |  |
| <b>609</b> | If no to Q608, why not?                                                        | <ol style="list-style-type: none"> <li>1. It was unplanned</li> <li>2. violator opposing</li> <li>3. Too far to get condom or</li> <li>4. Contraceptives (Not accessible)</li> <li>5. Method was expensive</li> <li>6. I have infrequent sex.</li> <li>7. other, specify /_____/</li> </ol> |  |
| <b>610</b> | What sexual and reproductive health problems you faced with in last 12 months? | <ol style="list-style-type: none"> <li>1. unwanted pregnancy</li> <li>2. abortion</li> <li>3. alcohol influenced unsafe sex</li> <li>4. STIs</li> </ol>                                                                                                                                     |  |

|            |                                            |                                                                                                                                                                                                                         |  |
|------------|--------------------------------------------|-------------------------------------------------------------------------------------------------------------------------------------------------------------------------------------------------------------------------|--|
|            |                                            | <ul style="list-style-type: none"> <li>5. Coercion (Rape).</li> <li>6. Coercion (Rape) attempted</li> <li>7. No problem</li> <li>8. other, specify /_____/</li> </ul>                                                   |  |
| <b>611</b> | Have you been pregnant? [FOR FEMALES ONLY] | <ul style="list-style-type: none"> <li>1. Yes</li> <li>2. No</li> </ul>                                                                                                                                                 |  |
| <b>612</b> | Were your pregnancies wanted?              | <ul style="list-style-type: none"> <li>1. Yes</li> <li>2. No</li> </ul>                                                                                                                                                 |  |
| <b>613</b> | If no, how did you become pregnant?        | <ul style="list-style-type: none"> <li>1. Contraceptive method not available</li> <li>2. Coercion (rape)</li> <li>3. Method failure</li> <li>4. lack of emphasis</li> <li>5. Other, specify /_____/</li> </ul>          |  |
| <b>614</b> | Did you give birth?                        | <ul style="list-style-type: none"> <li>1. Yes</li> <li>2. No</li> </ul>                                                                                                                                                 |  |
| <b>615</b> | Have you ever had abortion?                | <ul style="list-style-type: none"> <li>1. Yes</li> <li>2. No</li> </ul>                                                                                                                                                 |  |
| <b>616</b> | If yes to Q615, where did you abort?       | <ul style="list-style-type: none"> <li>1. At public health institution</li> <li>2. At private clinic</li> <li>3. At abortionist's house</li> <li>4. I have induced it myself</li> <li>5. Others, specify....</li> </ul> |  |

*Thank you*

## Uunkaa ragaan ittiin guuramu- Afaan Oromoo

Koodii uunkaa af-gaafii: \_\_\_\_\_

Maqaa nama ragaa funaanuu: \_\_\_\_\_

| T/L                         | Gaafilee                            | Deebii                                                                                                                                                                       | Yaada |
|-----------------------------|-------------------------------------|------------------------------------------------------------------------------------------------------------------------------------------------------------------------------|-------|
| <b>Odeeffannoo hirmataa</b> |                                     |                                                                                                                                                                              |       |
| <b>101</b>                  | Umrii (waggaan)                     | _____                                                                                                                                                                        |       |
| <b>102</b>                  | Koornayaa                           | 1. Dhiira<br>2. Dhalaa                                                                                                                                                       |       |
| <b>103</b>                  | Teessoo hammaa                      | 1. Magaala<br>2. Baadiyyaa                                                                                                                                                   |       |
| <b>104</b>                  | Bakka dhalootaa                     | _____                                                                                                                                                                        |       |
| <b>105</b>                  | Sabummaa                            | 1. Oromoo<br>2. Amhaara<br>3. Harari<br>4. Kan biroo, ibsi/_____/                                                                                                            |       |
| <b>106</b>                  | Amantii                             | 1. Musliima<br>2. Ortodoksii<br>3. Protestantii<br>4. Kan biraa, ibsi/_____/                                                                                                 |       |
| <b>107</b>                  | Haalli gaa'ela kee hamma maalinnii? | 1. Hamma kan heerumte/fuudhe<br>2. Kan heerumtee/fuudhee hin beekne<br>3. Kan hiikte/hiike<br>4. Kan abbaan manaa/haati manaa irraa du'e/duute<br>5. Kan biraa, ibsi /_____/ |       |

| <b>Waa'ee barnoota daa'imaa</b>     |                                                                                                |                                                                                                                                                                                                                                                                                                                         |  |
|-------------------------------------|------------------------------------------------------------------------------------------------|-------------------------------------------------------------------------------------------------------------------------------------------------------------------------------------------------------------------------------------------------------------------------------------------------------------------------|--|
| <b>201</b>                          | Haala barnootaa                                                                                | <ol style="list-style-type: none"> <li>1. Barumsa hordofee hin beeku</li> <li>2. Dubbisuu fi barreessuu qofa</li> <li>3. Kutaa 1 -4</li> <li>4. Kutaa 5 – 8</li> <li>5. Kutaa 9 -12</li> </ol>                                                                                                                          |  |
| <b>202</b>                          | Hanga hamma baruumsa hin hordofne yoo ta'e maaltu si dhorge?                                   | <ol style="list-style-type: none"> <li>1. Hiyyuma maatii/hanqina maallaqaa</li> <li>2. Manni baruumsaa dhiyeenya irraa dhabamuu</li> <li>3. Maatiin fayidaa barumsaa beekuu dhabuu</li> <li>4. Gargaarsa maatiif jecha manatti hafuu</li> <li>5. Kan biraa, ibsi/_____</li> </ol>                                       |  |
| <b>203</b>                          | Hamma barnoota yoo addaan kutte, maalif addaan kutte?                                          | <ol style="list-style-type: none"> <li>1. Maatiin kanfaltii mana barnootaa dadhabe</li> <li>2. Galii maatii koo deeggaruuf</li> <li>3. Baruumsatti waanin dadhabaa ta'eef</li> <li>4. Rakkoo fayyaa</li> <li>5. Rakkoo naamusaan hari'ame</li> <li>6. Ofii kootif dubbisuuf</li> <li>7. Kan biraa, ibsi_____</li> </ol> |  |
| <b>204</b>                          | Osoo carraan akka barnoota kee itti fuftu siif kennamee itti fufuuf fedhiifi gammachuu qabdaa? | <ol style="list-style-type: none"> <li>1. Eeyyee</li> <li>2. Lakki</li> </ol>                                                                                                                                                                                                                                           |  |
| <b>Odeeffannoo maatii hirmaataa</b> |                                                                                                |                                                                                                                                                                                                                                                                                                                         |  |
| <b>301</b>                          | Maatii qabdaa?                                                                                 | <ol style="list-style-type: none"> <li>1. Eeyyee</li> </ol>                                                                                                                                                                                                                                                             |  |

|            |                                                                          |                                                                                                                                                                                                                                                                                                                              |  |
|------------|--------------------------------------------------------------------------|------------------------------------------------------------------------------------------------------------------------------------------------------------------------------------------------------------------------------------------------------------------------------------------------------------------------------|--|
|            |                                                                          | 2. Lakki                                                                                                                                                                                                                                                                                                                     |  |
| <b>302</b> | Maatiin kee lubbuun jiruu?                                               | <ol style="list-style-type: none"> <li>1. Lachuu jiru</li> <li>2. Lachuu du'an</li> <li>3. Haadha qofatu jira</li> <li>4. Abbaa qofatu jira</li> <li>5. Hin beeku</li> </ol>                                                                                                                                                 |  |
| <b>303</b> | Lachuu kan jiran yoo ta'e, haalli gaa'ila isaanii maali irra ture/jiraa? | <ol style="list-style-type: none"> <li>1. Waliin jiru</li> <li>2. Waliigaltee dhabaan wal hiikani jiru</li> <li>3. Yeroof adda bahanii jiru (lolaan, hojiin...)</li> <li>4. Irraa du'ee/duutee jira/jirti</li> <li>5. Kophaa</li> <li>6. Du'aan adda bahan</li> <li>7. Hin beeku</li> <li>8. Kan biraa ibsi _____</li> </ol> |  |
| <b>304</b> | Walhiikani yoo jiran sababa maalitiin walhiikani?                        | <ol style="list-style-type: none"> <li>1. hiyyuummaa</li> <li>2. abbaan hojii barbaacha deeme</li> <li>3. amala badaa</li> <li>4. Kan biraa ibsi _____</li> </ol>                                                                                                                                                            |  |
| <b>305</b> | Galiin haadha keetii maalii?                                             | <ol style="list-style-type: none"> <li>1. Hojii guyyuu</li> <li>2. Daldaltuu waantota xixiqqoo</li> <li>3. Hojii dhuunfaa</li> <li>4. Hojjaattu mana namaa</li> <li>5. Kadhattuu</li> <li>6. Haadha manaa</li> <li>7. Kan biraa ibsi _____</li> </ol>                                                                        |  |
| <b>306</b> | What is/was your father's means of income/livelihood?                    | <ol style="list-style-type: none"> <li>1. Qonna</li> <li>2. Dafqaan bulaa</li> <li>3. Daldalaa</li> <li>4. Hojjataa mootummaa</li> </ol>                                                                                                                                                                                     |  |

|            |                                                                     |                                                                                                                                                                                                                      |  |
|------------|---------------------------------------------------------------------|----------------------------------------------------------------------------------------------------------------------------------------------------------------------------------------------------------------------|--|
|            |                                                                     | <ol style="list-style-type: none"> <li>5. Hojjataa dhuunfaa</li> <li>6. Kadhataa</li> <li>7. Raayyaa/raayya durii</li> <li>8. Waardiyyaa</li> <li>9. Kan biraa ibsi_____</li> </ol>                                  |  |
| <b>307</b> | Maatiin kee hamma eessa jiraatuu?                                   | <ol style="list-style-type: none"> <li>1. Harar keessa</li> <li>2. Magaalaa biro</li> <li>3. Baadiyyaa biroo</li> <li>4. Hin beeku</li> <li>5. Harar keessa yoo tae bakka isaa ibsi, Aanaa_____ganda_____</li> </ol> |  |
| <b>308</b> | Maatii hamma eenyutu gargaaraa jiraa?                               | <ol style="list-style-type: none"> <li>1. Abbaa koo qofa</li> <li>2. Haadha koo qofa</li> <li>3. Lachuu</li> <li>4. Ana</li> <li>5. Kan biraa ibsi_____</li> </ol>                                                   |  |
| <b>309</b> | Maatiin kee baqattoota yoo ta'an maalif bakka dhalootatii deemanii? | <ol style="list-style-type: none"> <li>1. Gogiinsaf/beelaf</li> <li>2. Hojii barbaachaf</li> <li>3. Wal'aansa fayyaaf</li> <li>4. Hin beeku</li> <li>5. Kan biro</li> </ol>                                          |  |
| <b>310</b> | Galiin maatii keetii ji'aan hammamii? tilmaaman                     | <ol style="list-style-type: none"> <li>1. &lt;1000</li> <li>2. 1000-2000</li> <li>3. &gt;2000</li> <li>4. Hin beeku</li> </ol>                                                                                       |  |
| <b>311</b> | Sadarkaan baruumsa abbaa keetii maalinnii ?                         | <ol style="list-style-type: none"> <li>4. Baruumsa hin qabu</li> <li>5. Dubbisuuf barreessuu</li> <li>6. Sadarkaa olaanaa kan xumure</li> </ol>                                                                      |  |
| <b>312</b> | Maatiin kee mana akkamii keessa jiraachaa jiruu?                    | <ol style="list-style-type: none"> <li>1. Mana dhagaa</li> <li>2. Mana muka shimalaa</li> <li>3. Mana dhoqqee</li> </ol>                                                                                             |  |

|                                                |                                                                    |                                                                                                                                                                                                                                                                                                                                      |  |
|------------------------------------------------|--------------------------------------------------------------------|--------------------------------------------------------------------------------------------------------------------------------------------------------------------------------------------------------------------------------------------------------------------------------------------------------------------------------------|--|
|                                                |                                                                    | <ul style="list-style-type: none"> <li>4. Pilaastika keessa</li> <li>5. qorqooroo</li> <li>6. Kan biraa ibsi_____</li> </ul>                                                                                                                                                                                                         |  |
| <b>Haala jireenya daa'ima kan yeroo hammaa</b> |                                                                    |                                                                                                                                                                                                                                                                                                                                      |  |
| <b>401</b>                                     | Yeroo hammamiif daandii irra jiraatee? (turmaata jireenya daandii) | <ul style="list-style-type: none"> <li>1. waggaa_____ fi Ji'a_____</li> <li>2. hin beeku/yaadadhu</li> </ul>                                                                                                                                                                                                                         |  |
| <b>402</b>                                     | Sababoota maalitu akka daandiitti baatu si godhe?                  | <ul style="list-style-type: none"> <li>1. Dhiibbaa hiriyootaan</li> <li>2. Hojii barbaacha</li> <li>3. Lola maatii waliinii</li> <li>4. Nyaata barbaacha</li> <li>5. Dirqamaan</li> <li>6. Du'a maatii</li> <li>7. Maatii keessatti nageenyi dhabamuu</li> <li>8. Gargaarsa maatii dhabuu</li> <li>9. Kan biraa ibsi_____</li> </ul> |  |
| <b>403</b>                                     | Hojjattaa?                                                         | <ul style="list-style-type: none"> <li>1. Eeyyee</li> <li>2. Lakki</li> </ul>                                                                                                                                                                                                                                                        |  |
| <b>404</b>                                     | Lakkii yoo ta'e akkamiin jiraattaa?                                | _____                                                                                                                                                                                                                                                                                                                                |  |
| <b>405</b>                                     | Hojiin kee daandii irraa maalinnii?                                | <ul style="list-style-type: none"> <li>1. Kadhaa</li> <li>2. Kophee haxaawuu</li> <li>3. Meeshalee xixiqoo baachuu</li> <li>4. Ergaa ergamuu</li> <li>5. Hanna</li> <li>6. Taaxii</li> <li>7. Kan biraa ibsi_____</li> </ul>                                                                                                         |  |
| <b>406</b>                                     | Guyyaatti maallaqa hammam argattaa?                                | <ul style="list-style-type: none"> <li>1. Qarshii 5 gadi</li> <li>2. Qarshii 5 -10</li> <li>3. Qarshii 10 -20</li> <li>4. Qarshii 30-50</li> </ul>                                                                                                                                                                                   |  |



|     |                                                                   |                                                                                                                                                |  |
|-----|-------------------------------------------------------------------|------------------------------------------------------------------------------------------------------------------------------------------------|--|
|     |                                                                   | 5. Qarshii 50 ol                                                                                                                               |  |
| 407 | Galii guyyaa maal fa'aa irra oolchitaa?                           | 1. Nyaata<br>2. Bakka bultii<br>3. Uffata<br>4. Kanfaltii mana barumsaa<br>5. Gargaarsa maatii<br>6. Kan biraa ibsi_____                       |  |
| 408 | Maatiikee kan gargaartu yoo ta'e, ilaalchi maatii keetii akkamii? | 1. Gammadoo dha<br>2. Gammadoo miti<br>3. Adda adda<br>4. Hin beeku                                                                            |  |
| 409 | Galiin kee guyyaa gahaa dha?                                      | 1. Eeyyee<br>2. Lakki                                                                                                                          |  |
| 410 | Daandii irratti kadhattaa?                                        | 1. Eeyyee<br>2. Lakki                                                                                                                          |  |
| 411 | Eeyyee yoo ta'e hammamiif?                                        | 1. Yeroo hunda<br>2. Yeroo baay'ee<br>3. Al tokko tokko<br>4. Darbee darbee<br>5. Gonkumaa                                                     |  |
| 412 | Osoo gara daandii hin bahin eenyu waliin jiraachaa turte?         | 1. Maatii koo lachuu waliin<br>2. Haadha koo waliin<br>3. Abbaa koo waliin<br>4. Fira waliin                                                   |  |
| 413 | Yeroo hammaa eenyu waliin jiraattaa?                              | 1. Haadha koo waliin<br>2. Maatii koo lachuu waliin<br>3. Fira waliin<br>4. Abbaa koo waliin<br>5. Hiriyoota waliin<br>6. Kan biraa, ibsi_____ |  |

|     |                                                                                                     |                                                                                                                                                                                                                                                 |  |
|-----|-----------------------------------------------------------------------------------------------------|-------------------------------------------------------------------------------------------------------------------------------------------------------------------------------------------------------------------------------------------------|--|
| 414 | Yeroo daandii irra jiraattu eenyutu si gargaara/eegaa?                                              | <ol style="list-style-type: none"> <li>1. Homtuu</li> <li>2. Ijoollee koo</li> <li>3. Hiriyoota</li> <li>4. Maatii</li> <li>5. Fira dhiyoo</li> </ol>                                                                                           |  |
| 415 | Maatii hammamiin ilaaltaa?                                                                          | <ol style="list-style-type: none"> <li>1. Guyyaa guyyaan</li> <li>2. Torbeetti altokko</li> <li>3. Ji'atti altokko</li> <li>4. Waggaatti yeroo muraasaf</li> <li>5. Darbee darbee</li> <li>6. Yeroo qabamaan ala</li> <li>7. Gnkumaa</li> </ol> |  |
| 416 | Maatiin kee ykn warri si guddisu hojii fi jireenya daandii irraa murteessuu danda'u jettee yaaddaa? | <ol style="list-style-type: none"> <li>1. Mirkanneessan</li> <li>2. Hin mirkaneessine</li> <li>3. Dhimma isaanii miti</li> <li>4. Ani hin beeku</li> </ol>                                                                                      |  |
| 417 | Guyyaatti al meeqa nyaattaa?                                                                        | <ol style="list-style-type: none"> <li>4. Al tokko</li> <li>5. Al lama</li> <li>6. Al sadii</li> </ol>                                                                                                                                          |  |
| 418 | Nyaata akkamiiti yeroo baay'ee kan nyaattu?                                                         | _____                                                                                                                                                                                                                                           |  |
| 419 | Irribaaf eessa dhaqxaa?                                                                             | <ol style="list-style-type: none"> <li>1. Mana</li> <li>2. Waldaa kiristaanaa</li> <li>3. masqiida</li> <li>4. buufata konkolaataa</li> <li>5. barandaa</li> <li>6. hoteela gatii xiqqaa</li> </ol>                                             |  |
| 420 | Rakkooleen gurguddoon jireenya daandii irraatti yeroo hammaa si mudatan maal fa'ii?                 |                                                                                                                                                                                                                                                 |  |

|                                                          |                                                                                                |                                                                                                                                                                         |  |
|----------------------------------------------------------|------------------------------------------------------------------------------------------------|-------------------------------------------------------------------------------------------------------------------------------------------------------------------------|--|
| 421                                                      | Yeroo daandii irra hojjaattu/jiraattu dhukkubsattee beektaa?                                   | 1. Eeyyee<br>2. Lakki                                                                                                                                                   |  |
| 422                                                      | Deebiin kee Q421 eeyyee yoo ta'e, dhukkuba akkamii?                                            |                                                                                                                                                                         |  |
| 423                                                      | Yoo dhukkubsatte eenyu waamtaa?                                                                |                                                                                                                                                                         |  |
| 424                                                      | Araada qabdaa?                                                                                 | 1. Eeyyee<br>2. Lakki                                                                                                                                                   |  |
| 425                                                      | Deebiin kee gaafii Q424, gosa kamii?                                                           |                                                                                                                                                                         |  |
| 426                                                      | Yeroo jireenya daandii nama gurguddaan rukutamtee ykn miidhamtee beektaa?                      | 1. Eeyyee<br>2. Lakki                                                                                                                                                   |  |
| 427                                                      | Namni qunnamtii saalaaf si dirqamsiise jiraa?                                                  | 1. Eeyyee<br>2. Lakki                                                                                                                                                   |  |
| 428                                                      | Maallaqaaf jettee qunnamtii saalaa nama waliin gootee beektaa?                                 | 1. Eeyyee<br>2. Lakki                                                                                                                                                   |  |
| 429                                                      | Yeroo hammaatti atattamaan gargaarsa maal barbaaddaa?                                          | 1. Nyaata<br>2. Uffata<br>3. Bakka jireenyaa<br>4. Barumsa<br>5. Gargaarsa maatii<br>6. Gargaarsa maallaqaa<br>7. Maatiin walitti dabalammuu<br>8. Kan biraa, ibsi_____ |  |
| 430                                                      | Yeroo hammaatti tarkaanfiin jireenya kee fooyyeessuuf fudhatammuu qaba jettee yaaddu maalinnii |                                                                                                                                                                         |  |
| <b>Araada adda adda fi fayyadama qoricha seera malee</b> |                                                                                                |                                                                                                                                                                         |  |
| 501                                                      | Dhugaatiiwwan alkoolii akka farsoo, daadhii, biiraa, araqee, fi kkf dhugdaa?                   | 1. Dhugee hin beeku<br>2. Al tokko ykn lama yaalera<br>3. Yeroo baay'ee nan dhuga                                                                                       |  |

|                                                                           |                                                                                |                                                                                                                                                     |  |
|---------------------------------------------------------------------------|--------------------------------------------------------------------------------|-----------------------------------------------------------------------------------------------------------------------------------------------------|--|
|                                                                           |                                                                                | 4. Guyyaanin dhuga                                                                                                                                  |  |
| <b>502</b>                                                                | Dhugaatii alkoolii akka dhugduuf maal si kakaase?                              | 1. Dibbirtii/Depression<br>2. Dhiibbaa hiriya<br>3. Beela irranfachuuf<br>4. Soda hir'isuuf (qunnamtii saalaa, hanna)<br>5. Kan biraa, ibsi /_____/ |  |
| <b>503</b>                                                                | Qoricha araadaa fudhattaa?                                                     | 1. Eeyyee<br>2. Lakki                                                                                                                               |  |
| <b>504</b>                                                                | Eeyyee yoo ta'e kam yeroo baay'ee fayyadamtaa?                                 | 1. Jimaa qama'uu<br>2. Ganjaa/Hashishii,<br>3. Xamboo aarsuu<br>4. Beenzila urgeeffachuu<br>5. Qorichoota lilmoo<br>6. Kan biraa, ibsi /_____/      |  |
| <b>505</b>                                                                | Qorichoota fayyadamuuf maaltu si kakaase?                                      | 1. Dibbirtii/Depression<br>2. Dhiibbaa hiriya<br>3. Beela irranfachuuf<br>4. Soda hir'isuuf (qunnamtii saalaa, hanna)<br>5. Kan biraa, ibsi /_____/ |  |
| <b>Shaakala amaloota hamaa walqunnamtii saalaa fi fayyaa walhormaataa</b> |                                                                                |                                                                                                                                                     |  |
| <b>601</b>                                                                | Walqunnamtii saalaa gootee beektaa?                                            | 3. Eeyyee<br>4. Lakki                                                                                                                               |  |
| <b>602</b>                                                                | Q601 eeyyee yoo ta'e, umrii meeqatti yeroo dursaaf walqunnamtii saalaa gootee? | _____                                                                                                                                               |  |
| <b>603</b>                                                                | Maalif yeroo san walqunnamtii saalaa gootee?                                   | 1. Heerumee/fuudhen<br>2. Jaaladheen<br>3. Fedhii dhuunfaatif                                                                                       |  |

|            |                                                                                                        |                                                                                                                                                                                                                                                                                                      |  |
|------------|--------------------------------------------------------------------------------------------------------|------------------------------------------------------------------------------------------------------------------------------------------------------------------------------------------------------------------------------------------------------------------------------------------------------|--|
|            |                                                                                                        | <ol style="list-style-type: none"> <li>4. Dirqiin gudeeddin</li> <li>5. Maallaqa ykn qarshii argachuuf</li> <li>6. Dhiibbaa hiriyaatin</li> <li>7. Dhiibba jimaa/alkolitiin</li> <li>8. Kan biraa, ibsi /_____/</li> </ol>                                                                           |  |
| <b>604</b> | Eenyu waliin walqunnamtii saalaa yeroo dursaa gootee?                                                  | <ol style="list-style-type: none"> <li>1. Haadha manaa/abbaa manaa</li> <li>2. Jaalallee dhaabbataa waliin</li> <li>3. Jaalallee yeroo waliin</li> <li>4. Miseensa maatii waliin</li> <li>5. Daldaloota salqunnamtii waliin</li> <li>6. Kan biraa, ibsi /_____/</li> </ol>                           |  |
| <b>605</b> | Ji'a tokko darbe keessatti walqunnamtii gootee beektaa?                                                | <ol style="list-style-type: none"> <li>1. Eeyyee</li> <li>2. Lakki</li> </ol>                                                                                                                                                                                                                        |  |
| <b>606</b> | Haga hammaa hiriya salqunnamtii meeqa qabdaa?                                                          | <ol style="list-style-type: none"> <li>1. _____</li> <li>2. NA</li> </ol>                                                                                                                                                                                                                            |  |
| <b>607</b> | Waggaa tokko darbe keessatti fedhii malee gudeedamtee beektaa?                                         | <ol style="list-style-type: none"> <li>1. Eeyyee</li> <li>2. Lakki</li> </ol>                                                                                                                                                                                                                        |  |
| <b>608</b> | Eeyyee yoo ta'e kondomii ykn qusannoo maatii fayyadamtee beektaa?                                      | <ol style="list-style-type: none"> <li>1. Eeyyee</li> <li>2. Lakki</li> </ol>                                                                                                                                                                                                                        |  |
| <b>609</b> | Q608 lakki yoo ta'e, maalif?                                                                           | <ol style="list-style-type: none"> <li>3. Karoora malee ture</li> <li>4. Dirqamaan</li> <li>5. Kondomii argachuuf fagoo ture</li> <li>6. Qusannoo maatii hin argamu</li> <li>7. Mi'aa ture</li> <li>8. Walqunnamtii saalaa yeroo hin murtoofnen godha</li> <li>9. Kan biraa, ibsi /_____/</li> </ol> |  |
| <b>610</b> | Rakkoon walqunnamtii saalaa ykn walhormaata fayyaa waggaa tokko darbe kana keessatti si mudate maalii? | <ol style="list-style-type: none"> <li>1. Ulfa hin barbaadamne</li> <li>2. Ulfa baasuu</li> <li>3. Walqunnamtii saalaa machii</li> <li>4. Dhukkuboota saal qunnamtii</li> </ol>                                                                                                                      |  |

|            |                                               |                                                                                                                                                                                                                              |  |
|------------|-----------------------------------------------|------------------------------------------------------------------------------------------------------------------------------------------------------------------------------------------------------------------------------|--|
|            |                                               | <ul style="list-style-type: none"> <li>5. Dirqiin gudeeddii</li> <li>6. Yaalii dirqiin gudeeddii</li> <li>7. Homtuu</li> <li>8. Kan biraa, ibsi /_____/</li> </ul>                                                           |  |
| <b>611</b> | Ulfooftee beektaa? [dubartoota qofaaf]        | <ul style="list-style-type: none"> <li>1. Eeyyee</li> <li>2. Lakkii</li> </ul>                                                                                                                                               |  |
| <b>612</b> | Ulfichi kan hin barbaadamne ture?             | <ul style="list-style-type: none"> <li>1. Eeyyee</li> <li>2. Lakki</li> </ul>                                                                                                                                                |  |
| <b>613</b> | Lakki yoo ta'e, akkamiin ulfaa'uu dandeessee? | <ul style="list-style-type: none"> <li>1. Qusannoo maatii hin jiru</li> <li>2. Gudeeddii</li> <li>3. qusannoo maatii hojjachuu didee</li> <li>4. xiyyeeffannoo kennuu dhiisuu</li> <li>5. kan biraa, ibsi /_____/</li> </ul> |  |
| <b>614</b> | Deessee beektaa?                              | <ul style="list-style-type: none"> <li>1. Eeyyee</li> <li>2. Lakki</li> </ul>                                                                                                                                                |  |
| <b>615</b> | Hanga hammaatti ulfa baaftee beektaa?         | <ul style="list-style-type: none"> <li>1. Eeyyee</li> <li>2. Lakki</li> </ul>                                                                                                                                                |  |
| <b>616</b> | Q615 eeyyee yoo ta'e, eessatti baaftee?       | <ul style="list-style-type: none"> <li>1. Dhaabbata fayyaa mootummaa</li> <li>2. Kilinika dhuunfaatti</li> <li>3. Mana nama ulfa baasuu</li> <li>4. Ofii kiyyaan</li> <li>5. Kan biraa, ibsi_____</li> </ul>                 |  |

***Galatoomaa***

# የመረጃ መሰብሰቢያ መሳሪያዎች

መጠይቅ ኮድ ቁጥር: \_\_\_\_\_

የመረጃ አሰጣሪ ስም: \_\_\_\_\_

| የመለያ ቁጥር                            | ጥያቄዎች                    | ምሳሌ                                                                            | መግለጫ |
|-------------------------------------|--------------------------|--------------------------------------------------------------------------------|------|
| <b>የጥናት ተሳታፊ ማህበራዊ-ስነ-ህዝብ ባህሪዎች</b> |                          |                                                                                |      |
| 101                                 | ዕድሜ (በዓመት)               | _____                                                                          |      |
| 102                                 | ፆታ                       | 1. ወንድ<br>2. ሴት                                                                |      |
| 103                                 | የአሁኑ አድራሻ                | 1. ከተማ<br>2. ገጠር                                                               |      |
| 104                                 | የትውልድ ቦታ                 | _____                                                                          |      |
| 105                                 | ጎሳ                       | 1. አሮሞ<br>2. አማራ<br>3. ሀረሪ<br>4. ሌላ ፣ ይግለጹ / _____ /                           |      |
| 106                                 | ሃይማኖት                    | 1. ሙስሊም<br>2. ኦርቶዶክስ<br>3. ፕሮቴስታንት<br>4. ሌላ ፣ ይግለጹ / _____ /                   |      |
| 107                                 | አሁን ያለዎት የትዳር ሁኔታ ምንድነው? | . በአሁኑ ጊዜ ያገባ<br>2. በጭራሽ አላገባም<br>3. ተፋታ<br>4. መበለት<br>5. ሌሎች ፣ ይግለጹ / _____ / |      |
| <b>የልጅ የትምህርት ዳራ</b>                |                          |                                                                                |      |
| 201                                 | የትምህርት ሁኔታ               | 1. በጭራሽ ትምህርት ቤት አይማሩ<br>2. ማንበብ እና መጻፍ ብቻ                                     |      |

|                                 |                                                                           |                                                                                                                                                                                                                                                                                     |  |
|---------------------------------|---------------------------------------------------------------------------|-------------------------------------------------------------------------------------------------------------------------------------------------------------------------------------------------------------------------------------------------------------------------------------|--|
|                                 |                                                                           | <ol style="list-style-type: none"> <li>3. 1 -4 ክፍል</li> <li>4. 5 - 8 ክፍል</li> <li>5. 9 -12 ክፍል</li> </ol>                                                                                                                                                                           |  |
| 202                             | በትምህርት ቤት ውስጥ ተመዝግበው የማያውቁ ከሆኑ ፣ ትምህርቱን ለመከታተል እንቅፋት የሚሆኑት ነገሮች ምንድን ናቸው? | <ol style="list-style-type: none"> <li>1. የቤተሰብ ድህነት / የገንዘብ ችግሮች</li> <li>2. በአቅራቢያ ምንም ትምህርት ቤት አይገኝም</li> <li>3. ቤተሰብ ዋጋን ከትምህርት ጋር አላያያዘም</li> <li>4. ቤተሰቡን ለመርዳት ቤት መቆየት ነበረበት</li> <li>5. ሌሎች (ይግለጹ)_____</li> </ol>                                                          |  |
| 203                             | አሁን ከትምህርት ቤት ማቋረጥ ከሆኑ ትምህርትዎን ለምን አቆሙ?                                   | <ol style="list-style-type: none"> <li>1. ቤተሰብ ከአሁን በኋላ የትምህርት ቤት ክፍያ መክፈል አልቻለም</li> <li>2. የቤተሰብን ገቢ ለመደገም መሥራት ነበረብኝ</li> <li>3. ደካማ የትምህርት አፈፃፀም</li> <li>4. የጤና / የህክምና ምክንያቶች</li> <li>5. በባህሪው ምክንያት ተባረዋል</li> <li>6. የራሴን ንባብ ለማድረግ</li> <li>7. ሌሎች (ይግለጹ)_____</li> </ol> |  |
| 204                             | አሁን ትምህርትዎን ለመቀጠል እድል ከተሰጠዎት እድሉን ለመጠቀም ፈቃደኛ እና ደስተኞች ናችሁ?                | <ol style="list-style-type: none"> <li>1. አዎ</li> <li>2. አይ</li> </ol>                                                                                                                                                                                                              |  |
| <b>ቃለ-መጠይቅ አድራጊው የቤተሰብ አመጣጥ</b> |                                                                           |                                                                                                                                                                                                                                                                                     |  |
| 301                             | ወላጆች አሉዎት?                                                                | <ol style="list-style-type: none"> <li>1. አዎ</li> <li>2. አይደለም</li> </ol>                                                                                                                                                                                                           |  |
| 302                             | ወላጆችህ በሕይወት አሉ?                                                           | <ol style="list-style-type: none"> <li>1. ሁለቱም በሕይወት አሉ</li> <li>2. ሁለቱም ሞተዋል</li> <li>3. በህይወት ያሉት እናት ብቻ</li> <li>4. በህይወት ያለ አባት ብቻ</li> <li>5. አላውቅም</li> </ol>                                                                                                                 |  |
| 303                             | ሁለቱም በሕይወት ካሉ የወላጆቻችሁ የጋብቻ ሁኔታ ምን ይመስላል / ነበር?                            | <ol style="list-style-type: none"> <li>1. ተጋብቶ አብሮ መኖር</li> <li>2. በመጥፎ ጋብቻ ዝግጅቶች ምክንያት የተፋቱ</li> </ol>                                                                                                                                                                             |  |



|     |                                     |                                                                                                                                                                                                                                           |  |
|-----|-------------------------------------|-------------------------------------------------------------------------------------------------------------------------------------------------------------------------------------------------------------------------------------------|--|
|     |                                     | <ol style="list-style-type: none"> <li>3. ሁኔታዊ መለያየት (ጦርነት ፣ የሥራ መፈናቀል...)</li> <li>4. መበለት</li> <li>5. ነጠላ ወላጅ</li> <li>6. በሞት ምክንያት ተለያይቷል</li> <li>7. አታውቅም</li> <li>8. ሌሎች (ይግለጹ)_____</li> </ol>                                     |  |
| 304 | ከተፋቱ በእርስዎ አመለካከት ለፍቺው መንስኤው ምንድነው? | <ol style="list-style-type: none"> <li>1. ድህነት</li> <li>2. አባት ፍለጋ ሥራ ፍለጋ ከቤት ወጣ</li> <li>3. መጥፎ ልማድ</li> <li>4. ሌሎች (ይግለጹ)_____</li> </ol>                                                                                               |  |
| 305 | የእናትዎ መተዳደሪያ ዘዴ ምን / ነበር?           | <ol style="list-style-type: none"> <li>1. መደበኛ ያልሆነ የዕለት ተዕለት ሠራተኛ</li> <li>2. ጥቃቅን ሻጭ / ነጋዴ</li> <li>3. ችሎታ ያለው ሠራተኛ / በራሱ ሥራ የሚሠራ</li> <li>4. የቤት ሰራተኛ</li> <li>5. ለማኝ</li> <li>6. የቤት ሚስት</li> <li>7. ሌላ (ይግለጹ)_____</li> </ol>        |  |
| 306 | የአባትዎ የገቢ / የኑሮ መተዳደሪያ ዘዴ ምን / ነበር? | <ol style="list-style-type: none"> <li>1. እርሻ</li> <li>2. መደበኛ ያልሆነ የቀን ሰራተኛ</li> <li>3. ነጋዴ</li> <li>4. የመንግስት ሰራተኛ</li> <li>5. የግል ሰራተኛ</li> <li>6. ለማኝ</li> <li>7. ወታደር / x-ወታደር</li> <li>8. ጠባቂ</li> <li>9. ሌላ (ይግለጹ)_____</li> </ol> |  |
| 307 | አሁን ወላጆችህ የት ይኖራሉ?                  | <ol style="list-style-type: none"> <li>1. በሐረር</li> <li>2. በሌላ የከተማ ከተማ</li> <li>3. በገጠር አካባቢዎች</li> </ol>                                                                                                                                |  |

|                               |                                                   |                                                                                                                                                                             |  |
|-------------------------------|---------------------------------------------------|-----------------------------------------------------------------------------------------------------------------------------------------------------------------------------|--|
|                               |                                                   | 4. አታውቅም                                                                                                                                                                    |  |
| 308                           | አሁን ቤተሰቡን የሚደግፈው ማነው?                             | <ol style="list-style-type: none"> <li>1. አባት ብቻ</li> <li>2. እናት ብቻ</li> <li>3. ሁለቱም እናት እና አባት</li> <li>4. እኔ ራሴ</li> <li>5. ሌላ (ይግለጹ)_____</li> </ol>                     |  |
| 309                           | ወላጆችዎ ስደተኞች ከሆኑ የትውልድ ቦታቸውን ለቀው ወጡ?               | <ol style="list-style-type: none"> <li>1. የድርቅ / ረሃብ ሁኔታ</li> <li>2. ሥራ ለመፈለግ</li> <li>3. ለሕክምና ሕክምና</li> <li>4. አታውቅም</li> <li>5. ሌሎች (ይግለጹ)_____</li> </ol>               |  |
| 310                           | የወላጆችዎ ወርሃዊ ገቢ ምንድነው? በግምት                        | <ol style="list-style-type: none"> <li>1. &lt;1000</li> <li>2. 1000-2000</li> <li>3. &gt;2000</li> <li>4. እኔ አላውቅም</li> </ol>                                               |  |
| 311                           | የአባትዎ የትምህርት ሁኔታ ምንድነው?                           | <ol style="list-style-type: none"> <li>1. ማንበብና መጻፍ</li> <li>2. ማንበብ እና መጻፍ ይችላል</li> <li>3. ከፍተኛ ክፍል ተጠናቀቀ</li> </ol>                                                      |  |
| 312                           | ወላጆችዎ የሚኖሩት በምን ዓይነት ቤት ውስጥ ነው?                   | <ol style="list-style-type: none"> <li>1. የጡብ ድንጋይ</li> <li>2. የቀርከሃ ዱላዎች</li> <li>3. የጭቃ ቤት</li> <li>4. ፕላስቲክ / ቁራጭ</li> <li>5. ቆርቆሮ</li> <li>6. ሌላ (ይግለጹ)_____</li> </ol> |  |
| <b>የልጁን የሕይወት ዘይቤ / ሁኔታዎች</b> |                                                   |                                                                                                                                                                             |  |
| 401                           | ለምን ያህል ጊዜ በጎዳና ሕይወት ውስጥ ተሰማርተሃል? (የጎዳና ህይወት ቆይታ) | <ol style="list-style-type: none"> <li>1. _____</li> <li>8, አላውቅም / አለስታውስም</li> </ol>                                                                                      |  |
| 402                           | ወደ ጎዳና አኗኗር እንድትወስድ ያስገደዱህ ነገሮች ምንድን ናቸው?         | <ol style="list-style-type: none"> <li>1. የእኩዮች ተጽዕኖ</li> <li>2. ሥራ ለመፈለግ</li> <li>3. ከወላጆች ጋር በድርድር</li> </ol>                                                             |  |

|     |                                                                      |                                                                                                                                                                                                         |  |
|-----|----------------------------------------------------------------------|---------------------------------------------------------------------------------------------------------------------------------------------------------------------------------------------------------|--|
|     |                                                                      | <ol style="list-style-type: none"> <li>4. ምግብ ፍለጋ</li> <li>5. በግዳጅ</li> <li>6. የወላጆች ሞት</li> <li>7. በቤተሰብ ውስጥ ሰላም ማጣት</li> <li>8. ቤተሰብ እኔን መደገፍ አለመቻል</li> <li>9. ሌላ ፣ (ይግለጹ) _____</li> </ol>          |  |
| 403 | ትሰራለህ?                                                               | <ol style="list-style-type: none"> <li>1. አዎ</li> <li>2. አይደለም</li> </ol>                                                                                                                               |  |
| 404 | መልስዎ አይሆንም ከሆነ እንዴት ይተርፋሉ?                                           | _____                                                                                                                                                                                                   |  |
| 405 | የጎዳና ላይ ሥራዎ ምንድነው?                                                   | <ol style="list-style-type: none"> <li>1. መለመን</li> <li>2. የጫማ አንጻባራቂ</li> <li>3. ትናንሽ እቃዎችን መሸከም</li> <li>4. መልዕክቶችን ማድረስ</li> <li>5. አከፋፋይ</li> <li>6. የታክሲ ልጅ</li> <li>7. ሌላ (ይግለጹ) _____</li> </ol> |  |
| 406 | በየቀኑ በአማካይ ስንት ያገኛሉ?                                                 | <ol style="list-style-type: none"> <li>1. ከአምስት ብር በታች</li> <li>2. 5 -10 ብር</li> <li>3. 10 -20 ብር</li> <li>4. 30-50 ብር</li> <li>5. ከ 50 ብር በላይ</li> </ol>                                               |  |
| 407 | ዕለታዊ ገቢዎን እንዴት ያጠፋሉ?                                                 | <ol style="list-style-type: none"> <li>1. ምግብ</li> <li>2. መጠለያ</li> <li>3. ጨርቅ</li> <li>4. የትምህርት ቤት ክፍያ</li> <li>5. ቤተሰብን መርዳት</li> <li>6. ሌላ (ይግለጹ) _____</li> </ol>                                  |  |
| 408 | ለቤተሰብ በጀቱ አስተዋጽኦ እያደረጉ ከሆነ ለወላጆችዎ ላበረከቱት አስተዋጽኦ ምን አመለካከት አለው?<br>1. | <ol style="list-style-type: none"> <li>1. ደስተኛ</li> <li>2. ደስተኛ ያልሆነ</li> <li>3. ግዴልሽነት</li> <li>4. አታውቅም</li> </ol>                                                                                    |  |

|     |                                        |                                                                                                                                                                                              |  |
|-----|----------------------------------------|----------------------------------------------------------------------------------------------------------------------------------------------------------------------------------------------|--|
|     |                                        |                                                                                                                                                                                              |  |
| 409 | የዕለት ገቢዎ አስተማማኝ ነው?                    | <ol style="list-style-type: none"> <li>1. አዎ</li> <li>2. አይደለም</li> </ol>                                                                                                                    |  |
| 410 | በጎዳናዎች ላይ ትለምናለህ?                      | <ol style="list-style-type: none"> <li>1. አዎ</li> <li>2. አይደለም</li> </ol>                                                                                                                    |  |
| 411 | አዎ ከሆነ ፣ ስንት ጊዜ ነው?                    | <ol style="list-style-type: none"> <li>1. ሁል ጊዜ</li> <li>2. ብዙ ጊዜ</li> <li>3. አንዳንድ ጊዜ</li> <li>4. አልፎ አልፎ</li> <li>5. በጭራሽ</li> </ol>                                                       |  |
| 412 | ወደ ጎዳና ሕይወት ከመጀመርዎ በፊት ከማን ጋር ይኖሩ ነበር? | <ol style="list-style-type: none"> <li>1. ከሁለቱም ወላጆች ጋር</li> <li>2. ከእናኑ ጋር</li> <li>3. ከአባት ጋር ብቻ</li> <li>4. ከቅርብ ዘመዶች ጋር</li> </ol>                                                       |  |
| 413 | አሁን ከማን ጋር ነው የምትኖረው?                  | <ol style="list-style-type: none"> <li>1. ከእናኑ ጋር</li> <li>2. ከሁለቱም ወላጆች ጋር</li> <li>3. ከዘመዶች ጋር</li> <li>4. ከአባት ብቻ ጋር</li> <li>5. ከእኩዮች / ጓደኞች ጋር</li> <li>6. ሌላ፣ ይግለጹ _____</li> </ol>    |  |
| 414 | ጎዳና ላይ ሳሉ ማን ይረዳዎታል እንዲሁም ይጠብቃል?       | <ol style="list-style-type: none"> <li>1. ማንም የለም</li> <li>2. እህትማማቾች</li> <li>3. የእኩዮች ቡድኖች</li> <li>4. ወላጆች</li> <li>5. የቅርብ ዘመድ</li> </ol>                                                |  |
| 415 | ብዙውን ጊዜ ቤተሰቦችዎን ምን ያህል ያዩታል / ይጎበኛሉ?   | <ol style="list-style-type: none"> <li>1. በየቀኑ</li> <li>2. በሳምንት ውስጥ ቢያንስ አንድ ጊዜ</li> <li>3. በየወሩ አንዴ</li> <li>4. በዓመት ውስጥ ጥቂት ጊዜ ብቻ</li> <li>5. አልፎ አልፎ</li> <li>6. ባልተስተካከለ ሁኔታ</li> </ol> |  |

|     |                                                                    |                                                                                              |  |
|-----|--------------------------------------------------------------------|----------------------------------------------------------------------------------------------|--|
|     |                                                                    | 7. በጭራሽ                                                                                      |  |
| 416 | ወላጆችዎ ወይም አሳዳጊዎችዎ ኑሮዎን እና ጎዳናዎች ላይ መሥራትዎን ያፀድቃሉ / አይቀበሉም ብለው ያስባሉ? | 1. ማጽደቅ<br>2. አልፏቸዋል<br>3. አይጨነቁም<br>4. አታውቅም                                                |  |
| 417 | በቀን ስንት ጊዜ ትበላለህ?                                                  | 1. አንዴ<br>2. ሁለት ጊዜ<br>3. ሶስት                                                                |  |
| 418 | ብዙውን ጊዜ የሚበሉት ምን ዓይነት ምግብ ነው?                                      | _____                                                                                        |  |
| 419 | ብዙውን ጊዜ የት ይተኛሉ?                                                   | 1. ቤት<br>2. የቤተክርስቲያን ጓጃዎች<br>3. የመስጊድ ጓጃዎች<br>4. የአውቶቡስ ማቆሚያዎች<br>5. በረንዳ ላይ<br>6. ርካሽ ሆቴሎች |  |
| 420 | በዕለት ተዕለት የጎዳና ሕይወትዎ ውስጥ በአሁኑ ጊዜ የሚያጋጥሙዎት ዋና ዋና ችግሮች ምንድናቸው?       |                                                                                              |  |
| 421 | በጎዳናዎች ላይ ሲኖሩ ወይም ሲሰሩ ታምመው ያውቃሉ?                                   | 1. አዎ<br>2. አይደለም                                                                            |  |
| 422 | አዎ ለ Q421 ከሆነ ምን ዓይነት ህመም ነው?                                      |                                                                                              |  |
| 423 | እንደታመሙ ብዙውን ጊዜ ማንን ነው የሚደውሉት?                                      |                                                                                              |  |
| 424 | ማንኛውም ዓይነት ልማድ / ሱስኛ አለዎት?                                         | 1. አዎ<br>2. አይደለም                                                                            |  |
| 425 | ለ Q424 አዎ ከሆነ ምን ዓይነት?                                             |                                                                                              |  |
| 426 | በጎዳናዎች ላይ በሚኖሩበት / በሚሰሩበት ጊዜ በአዋቂዎች ተደብድበው ወይም ተጎድተው ያውቃሉ?         | 1. አዎ<br>2. አይደለም                                                                            |  |
| 427 | ማንኛውም ወሲባዊ ድርጊት እንድትፈጽም ያስገደደዎት ሰው አለ?                             | 1. አዎ                                                                                        |  |

|                                   |                                                                                                      |                                                                                                                |  |
|-----------------------------------|------------------------------------------------------------------------------------------------------|----------------------------------------------------------------------------------------------------------------|--|
|                                   |                                                                                                      | 2. አይደለም                                                                                                       |  |
| 428                               | ለገንዘብ ሲሉ ከአንድ ሰው ጋር የግብረ ሥጋ ግንኙነት ፈጽመው ያውቃሉ?                                                         | 1. አዎ<br>2. አይደለም                                                                                              |  |
| 429                               | ከሚከተሉት ውስጥ የትኛው አስቸኳይ ፍላጎትዎ ነው?                                                                      | 1. ምግብ<br>2. ልብስ<br>3. መጠለያ<br>4. ትምህርት<br>5. የቤተሰብ ድጋፍ<br>6. የገንዘብ ድጋፍ<br>7. እንደገና ተቀላቀል<br>8. ሌላ (ይግለጹ)_____ |  |
| 430                               | የአኗኗር ዘይቤዎን ለማሻሻል እንዲረዳዎ በአሁኑ ጊዜ መከናወን ያለበት በጣም ተገቢው ጣልቃ-ገብነት እርምጃ / ግላዊነት በግልጽ ምን ይመስልዎታል ወይም ያምናሉ? |                                                                                                                |  |
| <b>ንጥረ ነገር እና አልኮል አላግባብ መጠቀም</b> |                                                                                                      |                                                                                                                |  |
| 501                               | እንደ ጠላ ፣ ጠጅ ፣ ቢራ ፣ አረኪ እና የመሳሰሉት የአልኮል መጠጥ ይጠጣሉ?                                                     | 1. በጭራሽ አልጠጡም<br>2. አንዴ ወይም ሁለቴ ሞክራለሁ<br>3. ብዙ ጊዜ እጠጣለሁ<br>4. በየቀኑ እጠጣለሁ                                       |  |
| 502                               | አልኮል እንዲጠቀሙ ምን ያስነሳዎታል?                                                                              | 1. ድብርት<br>2. የእኩዮች ተጽዕኖ<br>3. ረሃብን ለመጠበቅ<br>4. ፍርሀትን ለመጠበቅ (ወሲብ ፣ መስረቅ)<br>5. ሌላ ፣ ይግለጹ / _____ /             |  |
| 503                               | አደንዛዥ ዕፅ ይጠቀማሉ?                                                                                      | 1. አዎ<br>2. አይደለም                                                                                              |  |
| 504                               | አዎ ከሆነ የትኛው መድሃኒት ብዙ ጊዜ ይጠቀማሉ?                                                                       | 1. የቻት ማኘክ<br>2. ጋንጃ / ሀሺሽ ፣<br>3. ሲጋራ ማጨስ                                                                     |  |

|                                      |                                                       |                                                                                                                                                                             |  |
|--------------------------------------|-------------------------------------------------------|-----------------------------------------------------------------------------------------------------------------------------------------------------------------------------|--|
|                                      |                                                       | 4. ሳንፍፍ ቤንዜን<br>5. በመርፌ የሚሰጥ መድሃኒት<br>6. ሌላ ፣ ይግለጹ / _____ /                                                                                                                |  |
| 505                                  | አደንዛዥ ዕዕን እንዲጠቀሙ ምን ያስነሳዎታል?                          | 1. ድብርት<br>2. የእኩዮች ተጽዕኖ<br>3. ረሃብን ለመጠበቅ<br>4. ፍርሀትን ለመጠበቅ (ወሲብ)<br>5. ሌላ ፣ ይግለጹ / _____ /                                                                                 |  |
| <b>አደጋ ተጋላጭ ወሲባዊ እና ተዋልዶ ጤና ልምዶች</b> |                                                       |                                                                                                                                                                             |  |
| 601                                  | የግብረ ሥጋ ግንኙነት ፈጽመው ያውቃሉ?                              | 1. አዎ<br>2. አይደለም                                                                                                                                                           |  |
| 602                                  | ለቁ 601 አዎ ከሆነ በመጀመሪያ የግብረ ሥጋ ግንኙነት የፈጸሙበት ዕድሜ ስንት ነው? | _____                                                                                                                                                                       |  |
| 603                                  | ለመጀመሪያ ጊዜ የግብረ ሥጋ ግንኙነት ለመፈጸም ለምን ወሰኑ?                | 1. አገባለሁ<br>2. በፍቅር ወድቀዋል ::<br>3. የግል ፍላጎት.<br>4. ማስገደድ (አስገድዶ መድፈር) ::<br>5. ገንዘብ እና ሌሎች ስጦታዎች ለማግኘት.<br>6. የእኩዮች ተጽዕኖ<br>7. የጫት / የአልኮሆል ተጽዕኖ<br>8. ሌሎች ፣ ይግለጹ / _____ / |  |
| 604                                  | የመጀመሪያ የግብረ ሥጋ ግንኙነትዎን ከማን ጋር አደረጉ?                   | 1. ባል / ሚስት<br>2. ከተረጋጋ ወንድ / ሴት ጓደኛ ጋር<br>3. ከተለመደው ወንድ / ሴት ጓደኛ ጋር<br>4. ከቤተሰብ አባል ጋር<br>5. ከንግድ ወሲባዊ ሠራተኛ ጋር<br>6. ሌሎች ፣ ይግለጹ / _____ /                                  |  |
| 605                                  | ባለፈው 1 ወር ውስጥ የግብረ ሥጋ ግንኙነት ፈጽመዋል?                    | 1. አዎ<br>2. አይደለም                                                                                                                                                           |  |

|     |                                                           |                                                                                                                                                                                    |  |
|-----|-----------------------------------------------------------|------------------------------------------------------------------------------------------------------------------------------------------------------------------------------------|--|
| 606 | ስንት የወሲብ አጋሮች አጋጥመው ያውቃሉ?                                 | 3. _____<br>4. NA                                                                                                                                                                  |  |
| 607 | ያለፉት 12 ወራት ያለእርስዎ ፈቃድ ተደፍረዋል?                            | 1. አዎ<br>2. አይደለም                                                                                                                                                                  |  |
| 608 | አዎ ከሆነ ፣ ኮንዶም ወይም የእርግዝና መከላከያዎችን ተጠቅመዋል?                 | 1. አዎ<br>2. አይደለም                                                                                                                                                                  |  |
| 609 | አይደለም፣ ለምን አይሆንም?                                         | 1. ያልታቀደ ነበር<br>2. የቫዮሌት ተቃራኒ<br>3. ኮንዶምን ለማግኘት በጣም ወይም<br>4. የእርግዝና መከላከያ (ተደራሽ አይደለም)<br>5. ዘዴው ውድ ነበር<br>6. አልፎ አልፎ ወሲብ አለብኝ ::<br>7. ሌላ ፣ ይግለጹ / _____ /                       |  |
| 610 | ባለፉት 12 ወራት ውስጥ ምን ዓይነት ወሲባዊ እና ሥነ ተዋልዶ ጤና ችግሮች አጋጥመውዎታል? | 1. የማይፈለግ እርግዝና<br>2. ፅንሰ ማስወረድ<br>3. አልኮሎል ጤናማ ያልሆነ ወሲብ<br>4. የአባለዘር በሽታዎች<br>5. ማስገደድ (አስገድዶ መድፈር) ::<br>6. ማስገደድ (አስገድዶ መድፈር) ሙከራ አድርጓል<br>7. ችግር የለም<br>8. ሌላ ፣ ይግለጹ / _____ / |  |
| 611 | እርጉዝ ነዎት? [ለፍልስፍናዎች ብቻ]                                   | 1. አዎ<br>2. አይደለም                                                                                                                                                                  |  |
| 612 | እርግዝና ይፈለጉ ነበር?                                           | 1. አዎ<br>2. አይደለም                                                                                                                                                                  |  |
| 613 | አይሆንም ከሆነ እንዴት አረዝቱ?                                      | 1. የእርግዝና መከላከያ ዘዴ አይገኝም<br>2. ማስገደድ (አስገድዶ መድፈር)<br>3. ዘዴ አለመሳካት<br>4. አፅንዖት ማጣት<br>5. ሌላ ፣ ይግለጹ / _____ /                                                                        |  |



|     |                              |                                                                                                                                                                        |  |
|-----|------------------------------|------------------------------------------------------------------------------------------------------------------------------------------------------------------------|--|
| 614 | ወለዱ?                         | <ul style="list-style-type: none"> <li>3. አዎ</li> <li>4. አይደለም</li> </ul>                                                                                              |  |
| 615 | ፅንሰ ማስወረድዎን ያውቃሉ?            | <ul style="list-style-type: none"> <li>3. አዎ</li> <li>4. አይደለም</li> </ul>                                                                                              |  |
| 616 | ለ Q615 አዎ ከሆነ የት ነው ያስወገደከው? | <ul style="list-style-type: none"> <li>1. በሕዝብ ጤና ተቋም</li> <li>2. በግል ክሊኒክ</li> <li>3. በፅንሰ ማስወገጃ ቤት ውስጥ</li> <li>4. እኔ እራሴ አነሳሁት</li> <li>5. ሌሎች ፣ ይግለጹ...</li> </ul> |  |

**አመሰግናለሁ**
